# Supplementary material for: Inherited variants affecting RNA editing may contribute to ovarian cancer susceptibility: results from a large-scale collaboration
Source: Oncotarget. 2016 Jul 12;7(45):72381–94. doi: 10.18632/oncotarget.10546 (PMC5340123; doi:10.18632/oncotarget.10546)
Supplement: Supplementary file 1 [file oncotarget-07-72381-s001.pdf]

## **Inherited variants affecting RNA editing may contribute to ovarian cancer susceptibility: results from a large-scale collaboration**

### **Supplementary Material**

**Supplementary Table 1:** Description of individual OCAC studies and case-control sets included in the analysis of RNA editing SNPs and EOC susceptibility<sup>1</sup>.

For Table S1, please see the attached file

**Supplementary Table 2:** HaploReg view of top *ADAR* eQTL SNP rs1127313 and proxies.

For Table S2, please see the attached Excel file
